# Supplementary material for: Mithramycin A suppresses basal triple-negative breast cancer cell survival partially via down-regulating Krüppel-like factor 5 transcription by Sp1
Source: PubMed Central journal article supplement (PMC5773554; doi:10.1038/s41598-018-19489-6), 2018-01-18
Supplement: 41598_2018_19489_MOESM1_ESM.pdf [file 41598_2018_19489_MOESM1_ESM.pdf]

**Mithramycin A suppresses basal triple-negative breast cancer cell survival partially via down-regulating Krüppel-like factor 5 transcription by Sp1**

Rong Liu<sup>1#</sup>, Xu Zhi<sup>2#</sup>, Zhongmei Zhou<sup>1</sup>, Hailin Zhang<sup>1</sup>, Runxiang Yang<sup>3</sup>,  
Tianning Zou<sup>4</sup>, Ceshi Chen<sup>1\*</sup>

<sup>1</sup>Kunming Institute of Zoology, Chinese Academy of Sciences, Key Laboratory of Animal Models and Human Disease Mechanisms of Chinese Academy of Sciences & Yunnan Province, Kunming, 650223, China

<sup>2</sup>Center for Reproductive Medicine, Department of Obstetrics and Gynecology, Peking University Third Hospital, Beijing 100191, China

<sup>3</sup>Department of Oncology, Yunnan Tumor Hospital, The Third Affiliated Hospital of Kunming Medical University, Kunming, Yunnan, 650118, China

<sup>4</sup>Department of Breast Surgery, Yunnan Tumor Hospital, The Third Affiliated Hospital of Kunming Medical University, Kunming, Yunnan, 650118, China

## Supplementary Figure legends

### **Figure S1. MIT suppresses HCC1937 xenograft growth and induces apoptosis *in vivo*.**

**A.** MIT suppressed HCC1937 tumor growth in Balb/c nude mice. HCC1937 cells were injected into the fat pad of female Balb/c nude mice. When the average tumor size reached approximately 100 mm<sup>3</sup> after inoculation, the mice were randomly and equally distributed into two groups (n=6/group): saline control and 0.05 or 0.15 mg/kg MIT/d. Tumor size were measured twice per week for 7 weeks. Tumors were collected 7 weeks after MIT treatment.

**B.** MIT significantly decreased tumor weights compared to the saline control group (\*\*, p<0.01, t-test).

**C.** MIT did not decrease the body weight of mice. The mice were weighed at the end of the experiment.

**D-E.** MIT suppressed HCC1937 cell proliferation and promoted apoptosis *in vivo*. Tumors collected from saline control and MIT groups were paraffin-fixed, sliced and stained with anti-ki-67 (D) or cleaved-caspase 3 (E). (\*, p<0.05, t-test). The quantitative results are shown on the right.

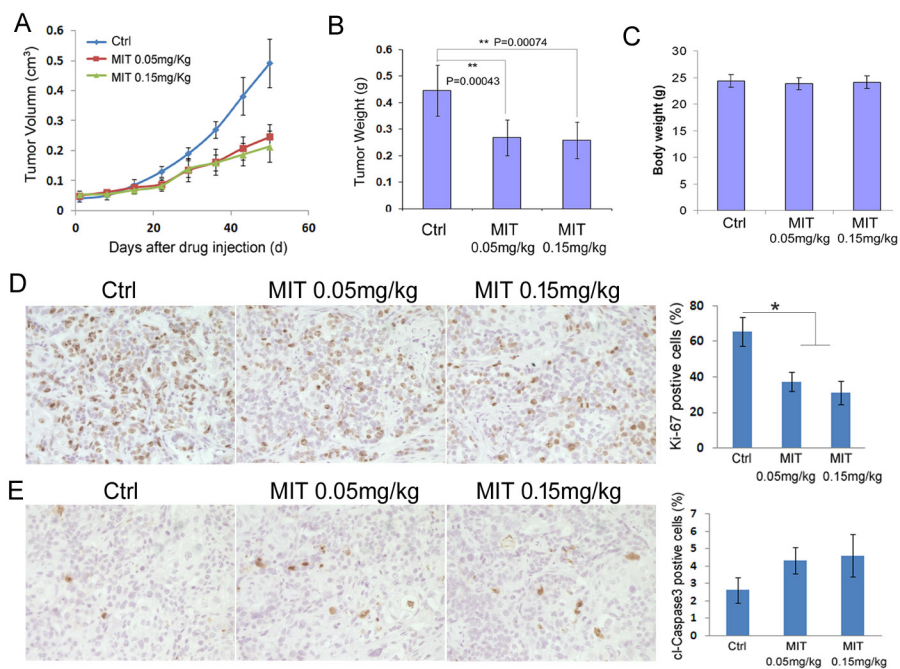

Figure S1
